# Supplementary material for: The development and psychometric validation of the Postpartum Posttraumatic Growth Inventory (PP-PTGI)
Source: Research Square preprint supplement (doi:10.21203/rs.3.rs-7309721/v1), 2025-09-10
Supplement: Supplementary file 1 [file 54bdc76f110fbc44e450930d.docx]

**Postpartum Posttraumatic Growth Inventory (PP-PTGI)**

The following table contains 26 questions regarding possible positive changes brought about by trauma. Please read each item carefully and select the option that best matches your current situation by ticking “√”.

| Item Description | Strongly Disagree (1) | Disagree (2) | Neutral (3) | Agree  (4) | Strongly Agree (5) |
| --- | --- | --- | --- | --- | --- |
| 1.I am better able to regulate my emotions and maintain stability. |  |  |  |  |  |
| 2.I am more attentive and patient when doing things. |  |  |  |  |  |
| 3.I can handle some problems independently, rather than relying on others. |  |  |  |  |  |
| 4.I am now calmer and more rational when facing life’s challenges. |  |  |  |  |  |
| 5.I have improved my ability to take care of my child. |  |  |  |  |  |
| 6.I have learned to take others’ perspectives and show more empathy toward others. |  |  |  |  |  |
| 7.I am more willing to seek help from family and friends when needed. |  |  |  |  |  |
| 8.I am better at communicating with family and friends. |  |  |  |  |  |
| 9.I am more willing to share my feelings and thoughts with my partner. |  |  |  |  |  |
| Item Description | Strongly Disagree (1) | Disagree (2) | Neutral (3) | Agree  (4) | Strongly Agree (5) |
| 10.I am more grateful for my family’s care and more engaged in our relationship. |  |  |  |  |  |
| 11.I have developed a greater sense of belonging to my family. |  |  |  |  |  |
| 12.I accept that not all life events will go according to my wishes. |  |  |  |  |  |
| 13.I have reordered my priorities in life. |  |  |  |  |  |
| 14.I have learned to live in the present and not dwell on past regrets. |  |  |  |  |  |
| 15.I feel more confident in my ability to cope with difficulties. |  |  |  |  |  |
| 16.I have become stronger and more resilient. |  |  |  |  |  |
| 17.I feel more grateful for life and more tolerant toward others. |  |  |  |  |  |
| 18.I have re-examined and reorganized my life priorities. |  |  |  |  |  |
| 19.I cherish life more and value meaningful things. |  |  |  |  |  |
| 20.I strive to become a better person in the eyes of my loved ones. |  |  |  |  |  |
| 21.I can appreciate the beauty of ordinary moments. |  |  |  |  |  |
| 22.I have become more tolerant toward my child. |  |  |  |  |  |
| Item Description | Strongly Disagree (1) | Disagree (2) | Neutral (3) | Agree  (4) | Strongly Agree (5) |
| 23.I have become more willing to care for others. |  |  |  |  |  |
| 24.I have developed closer relationships with my family and friends. |  |  |  |  |  |
| 25.I try to balance work and/or childcare to create a better life. |  |  |  |  |  |
| 26.I have set new goals for work and/or study. |  |  |  |  |  |
